# Supplementary material for: Selecting single cell clustering parameter values using subsampling-based robustness metrics
Source: PubMed Central journal article supplement (PMC7852188; doi:10.1186/s12859-021-03957-4), 2021-02-01
Supplement: 12859_2021_3957_MOESM1_ESM.pdf [file 12859_2021_3957_MOESM1_ESM.pdf]

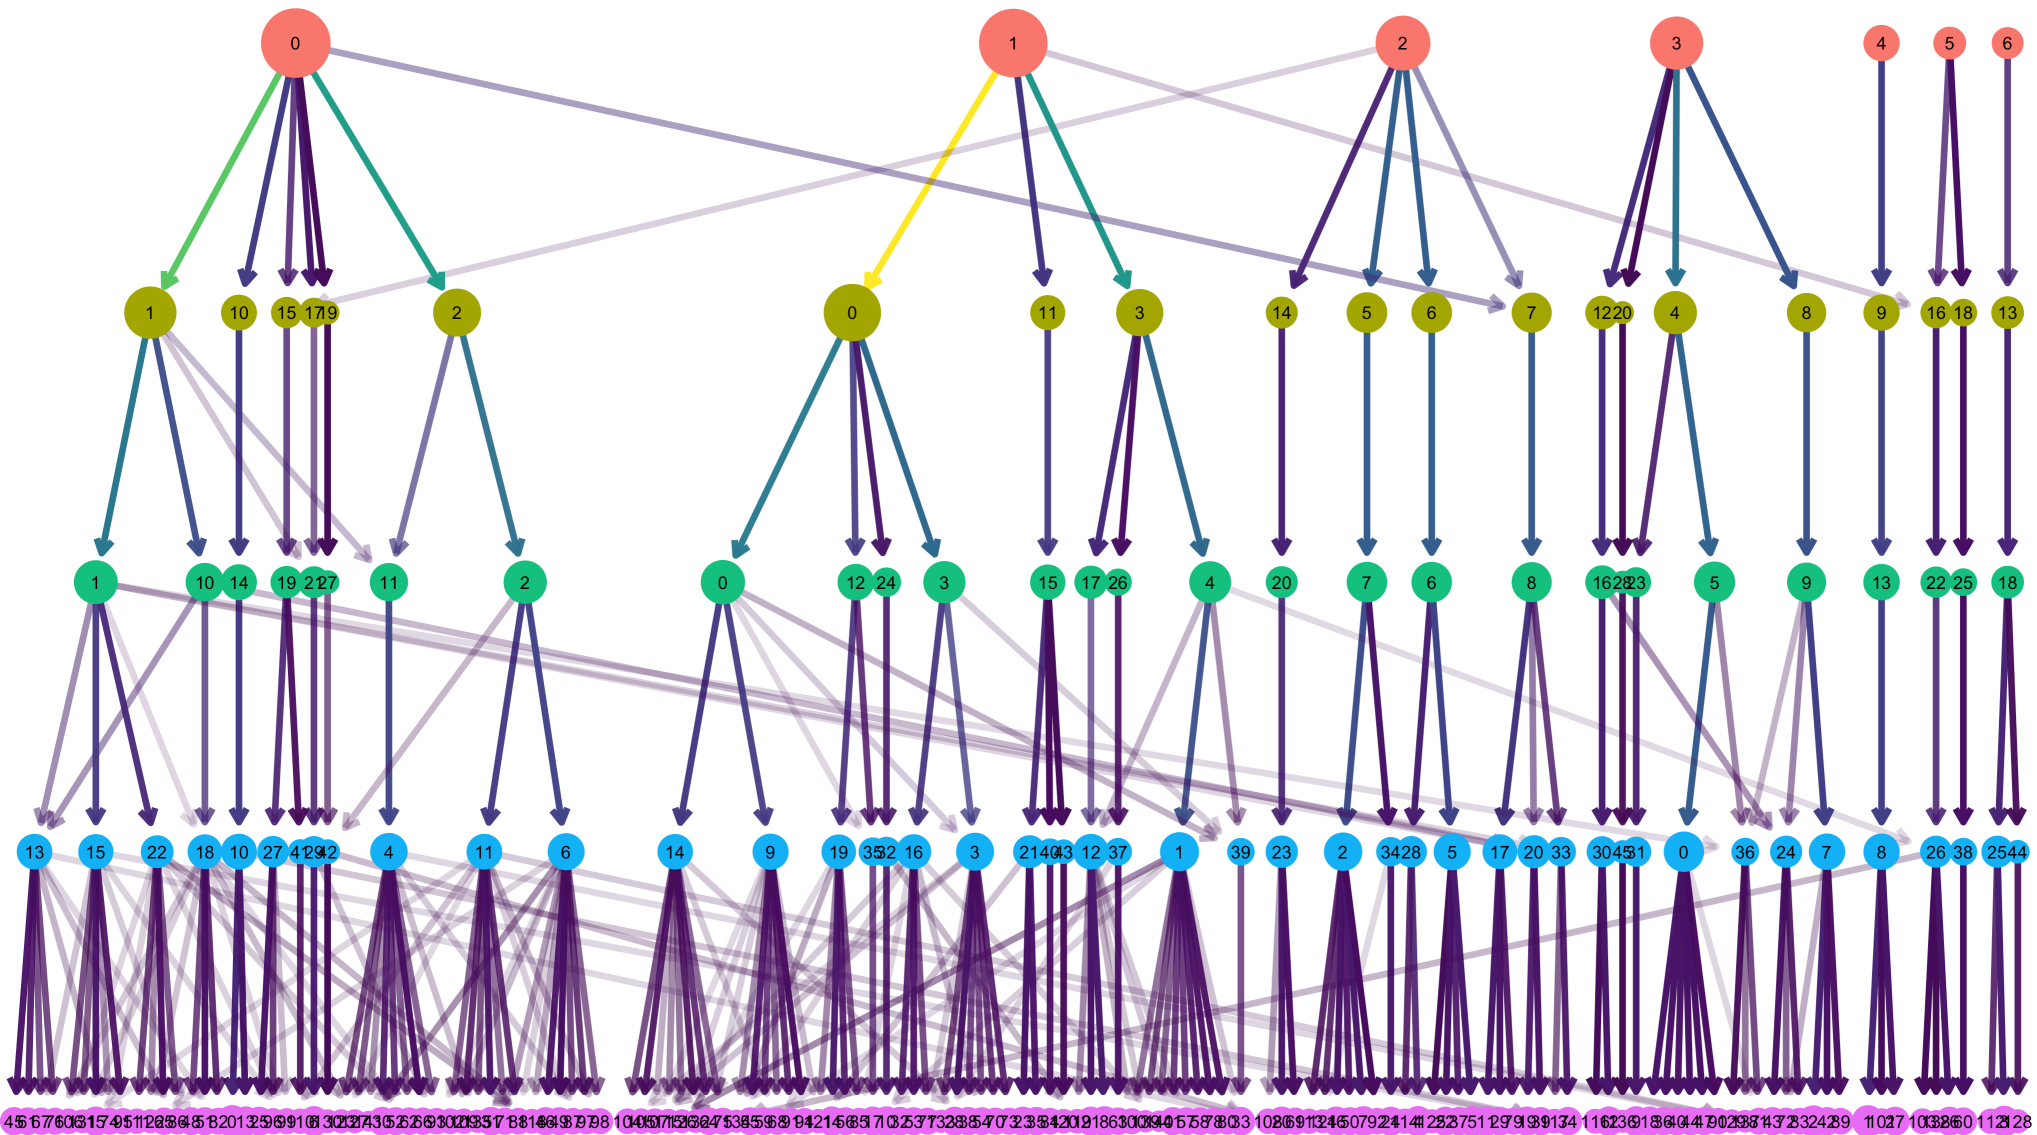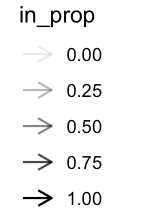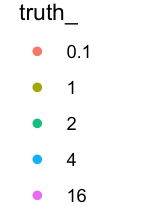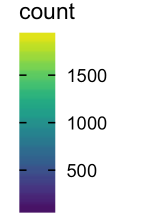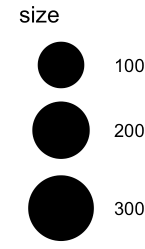

45 67 60 61 5 15 45 11 28 45 5 8 20 1 25 9 9 1 8 3 2 2 7 4 3 5 2 2 6 3 10 2 3 5 7 8 1 4 4 9 7 9 8 10 4 5 7 1 2 6 2 4 5 3 8 5 6 9 4 2 1 5 6 9 7 0 2 5 7 3 2 8 5 4 7 0 3 3 5 4 2 0 9 1 8 6 3 0 9 4 1 5 7 8 0 3 10 2 6 9 1 2 4 5 0 7 9 2 4 1 4 2 2 2 7 5 1 2 9 9 9 9 1 3 4 1 1 6 2 3 6 1 8 6 0 4 4 2 0 2 3 8 4 7 2 3 2 4 2 9 10 2 7 10 3 2 6 0 1 2 1 2 8
