# Supplementary material for: Selecting single cell clustering parameter values using subsampling-based robustness metrics
Source: PubMed Central journal article supplement (PMC7852188; doi:10.1186/s12859-021-03957-4), 2021-02-01

**Search over number of variable genes selected**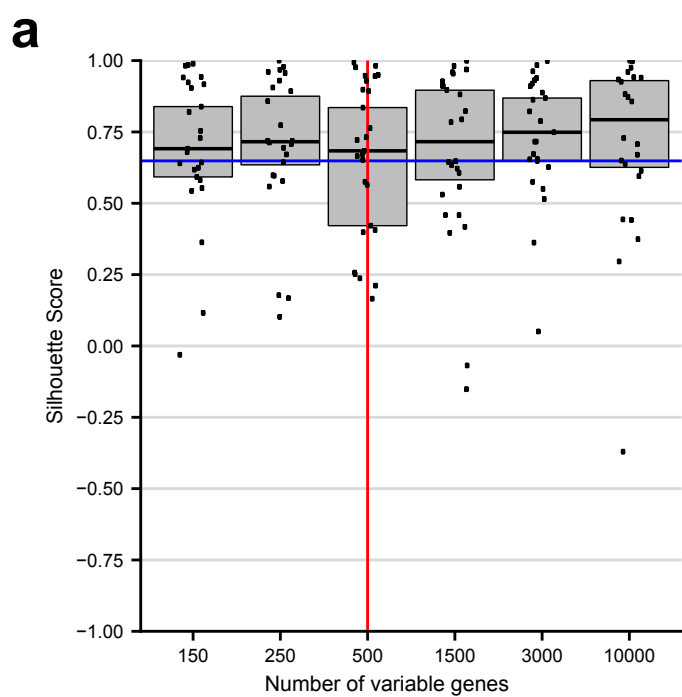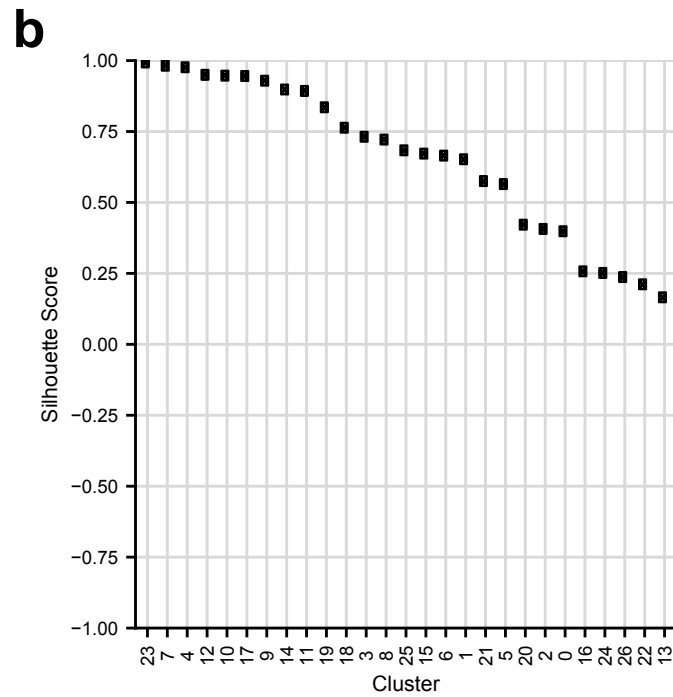**Search over number of PCs**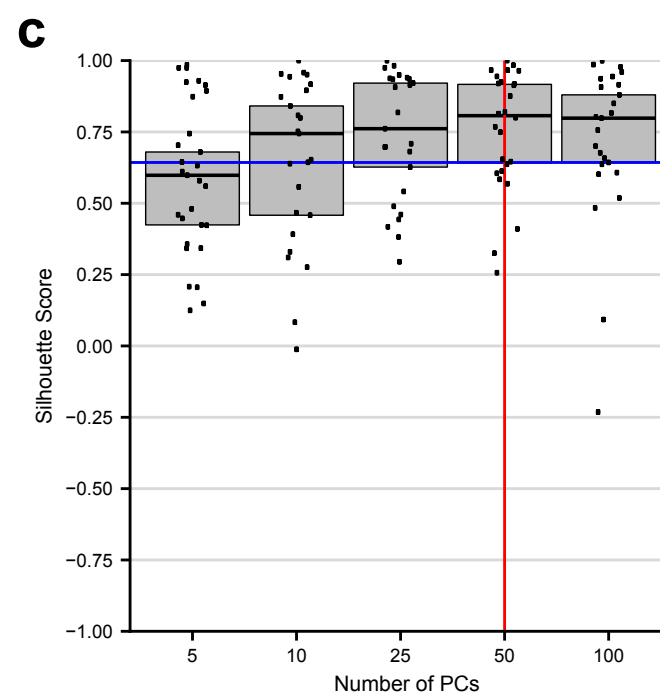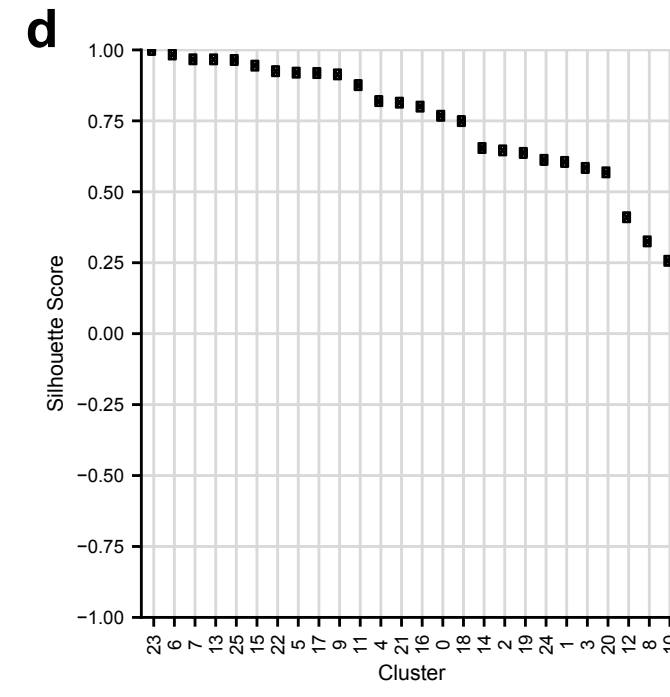**With 20 percent of cells subsampled per iteration**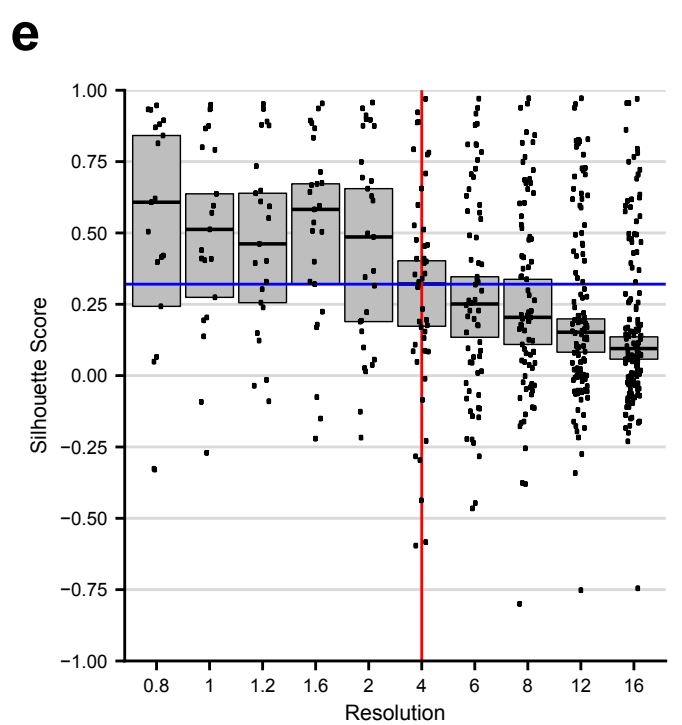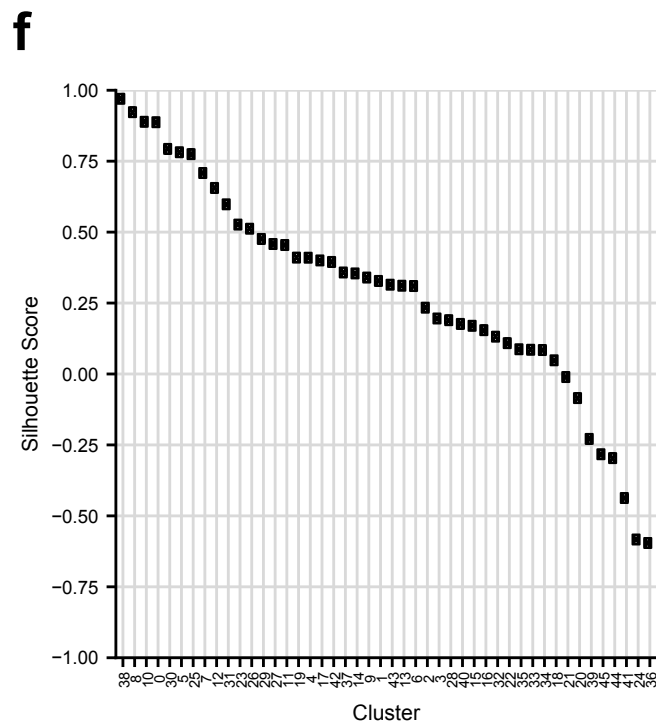**With 50 percent of cells subsampled per iteration**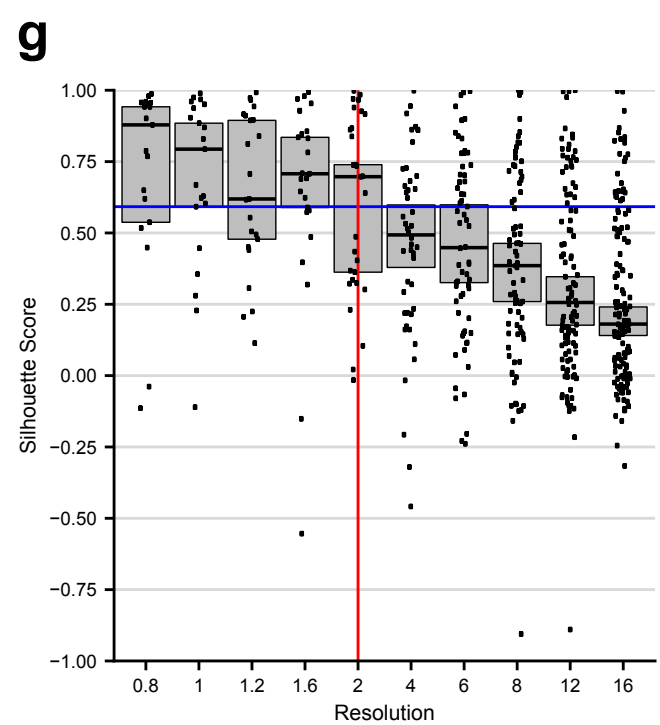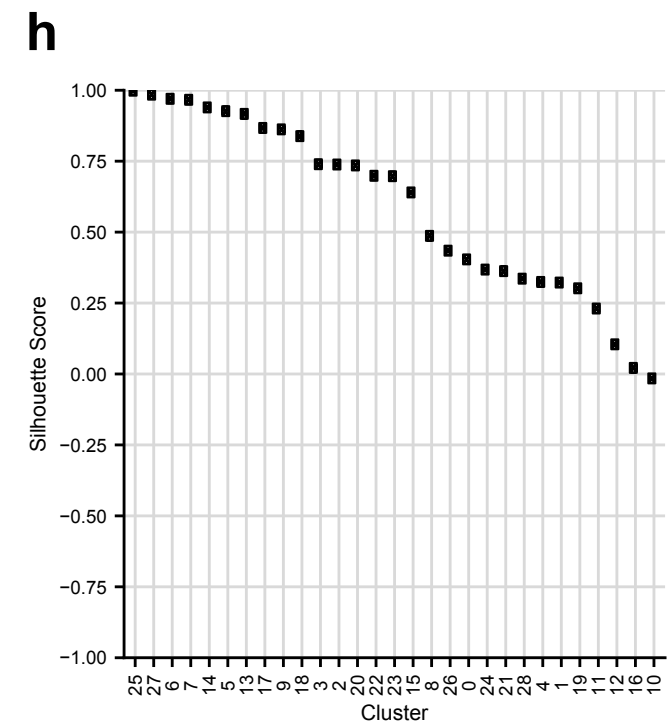**With 20 iterations**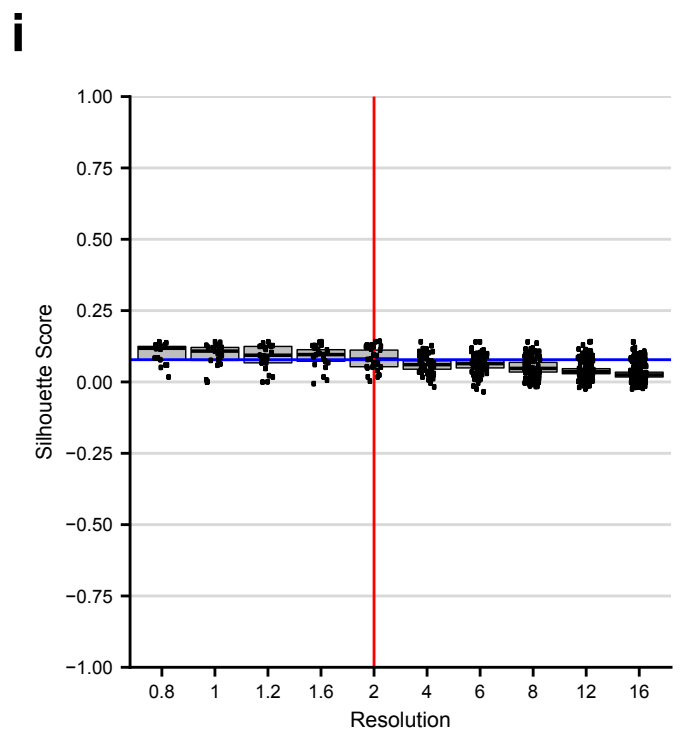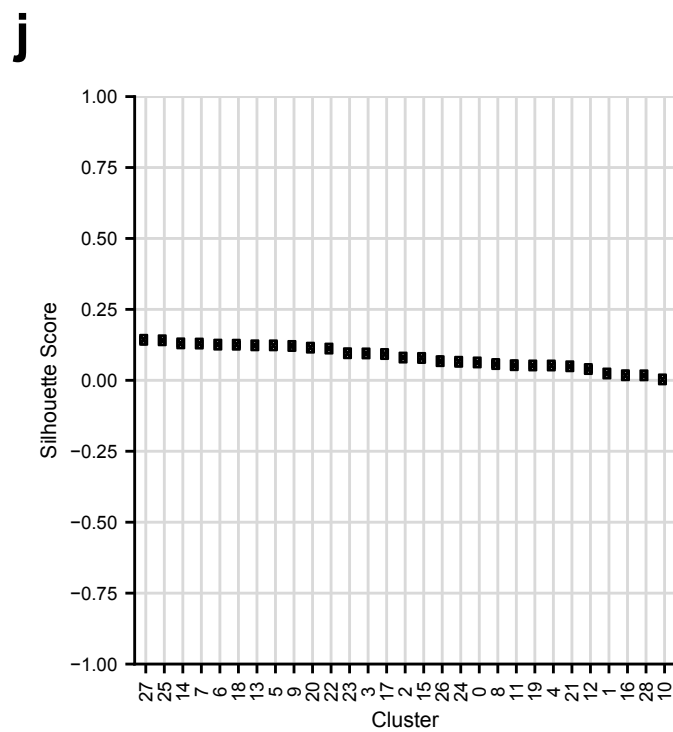**With 50 iterations**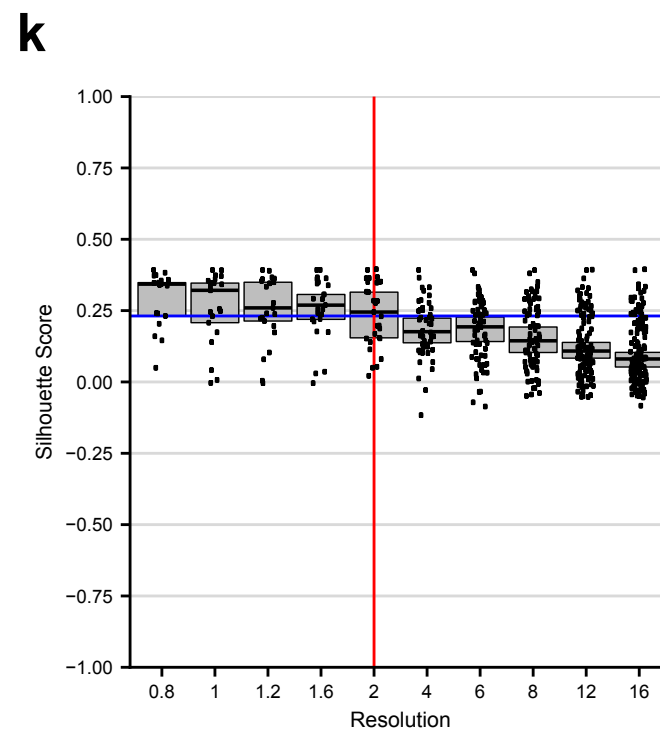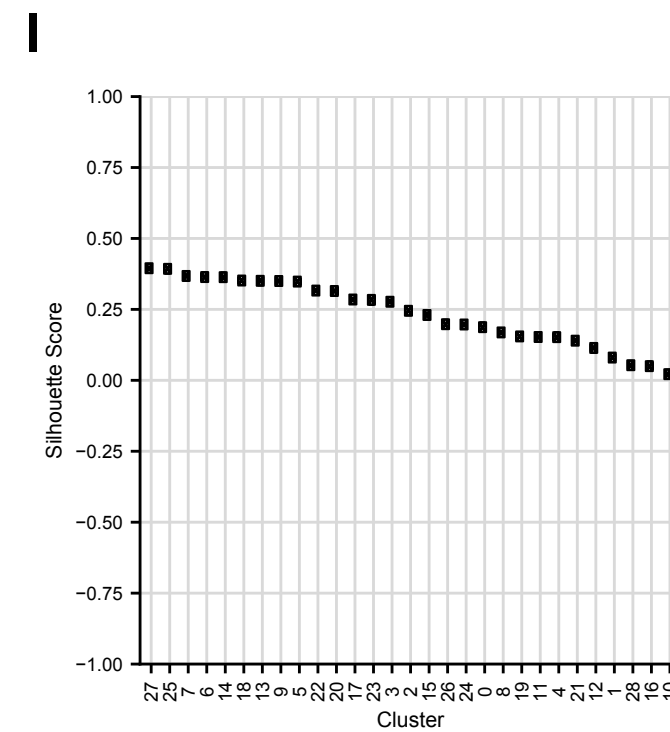

Supplement: 12859_2021_3957_MOESM3_ESM.pdf [file 12859_2021_3957_MOESM3_ESM.pdf]
