# Supplementary material for: Selecting single cell clustering parameter values using subsampling-based robustness metrics
Source: PubMed Central journal article supplement (PMC7852188; doi:10.1186/s12859-021-03957-4), 2021-02-01

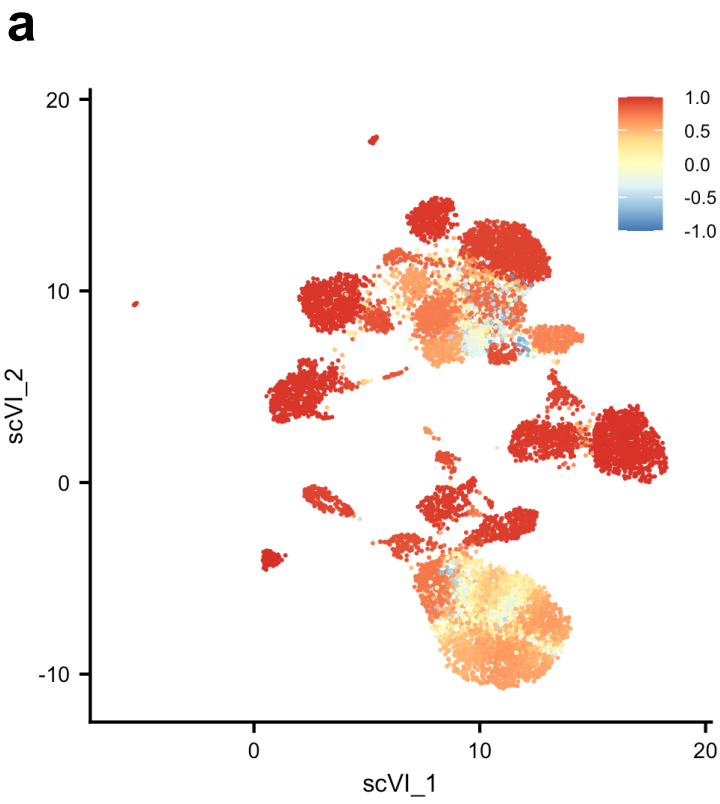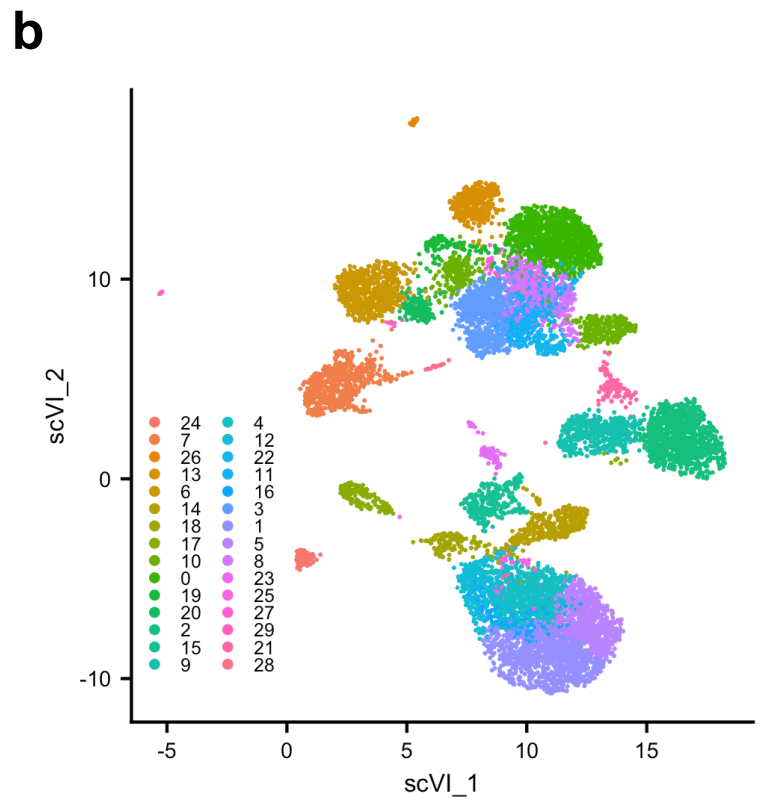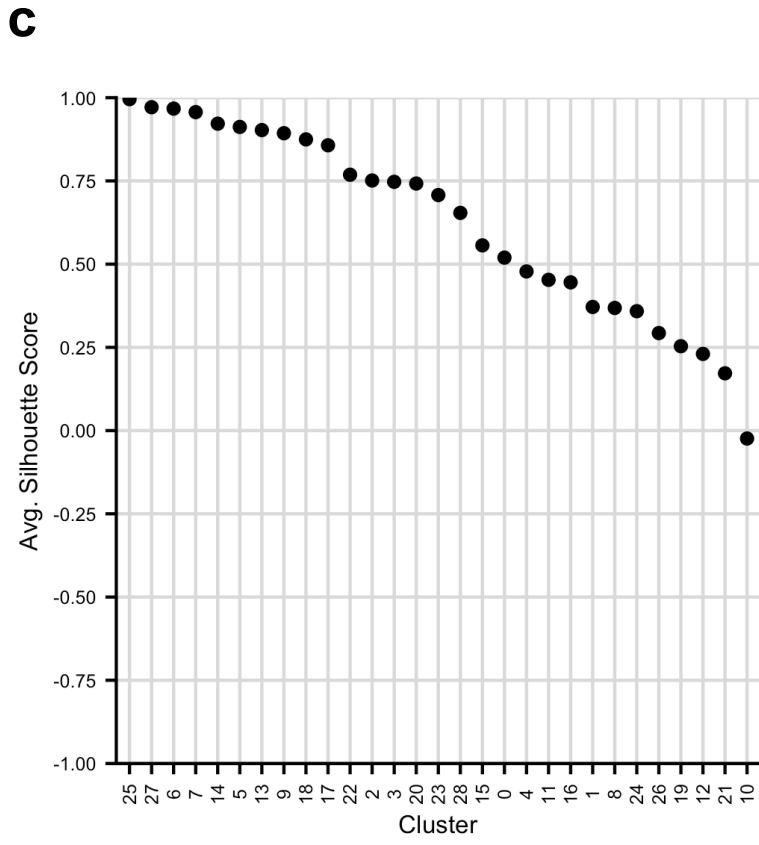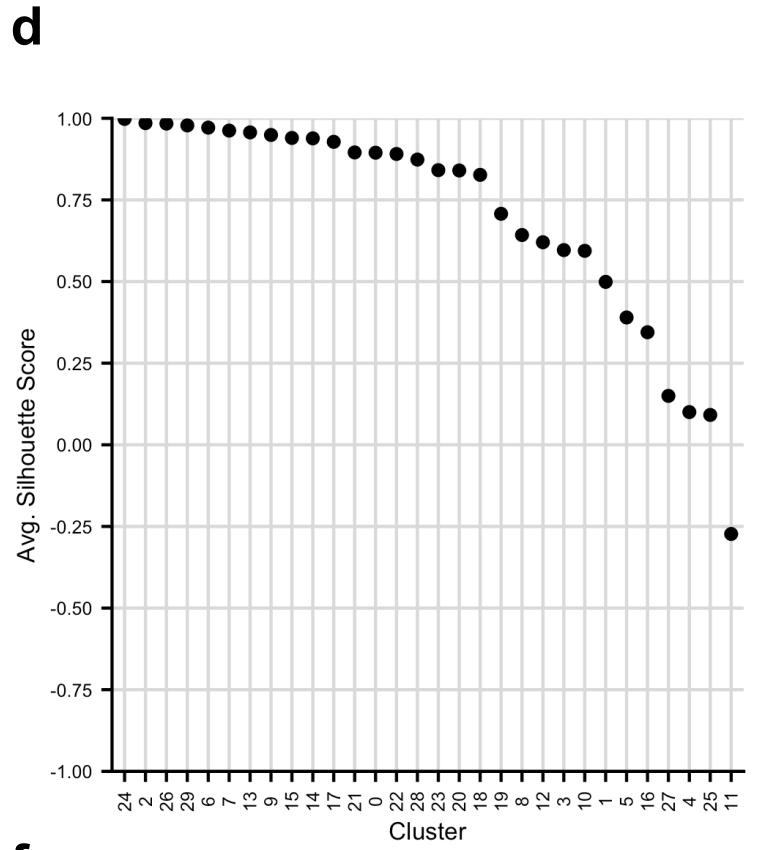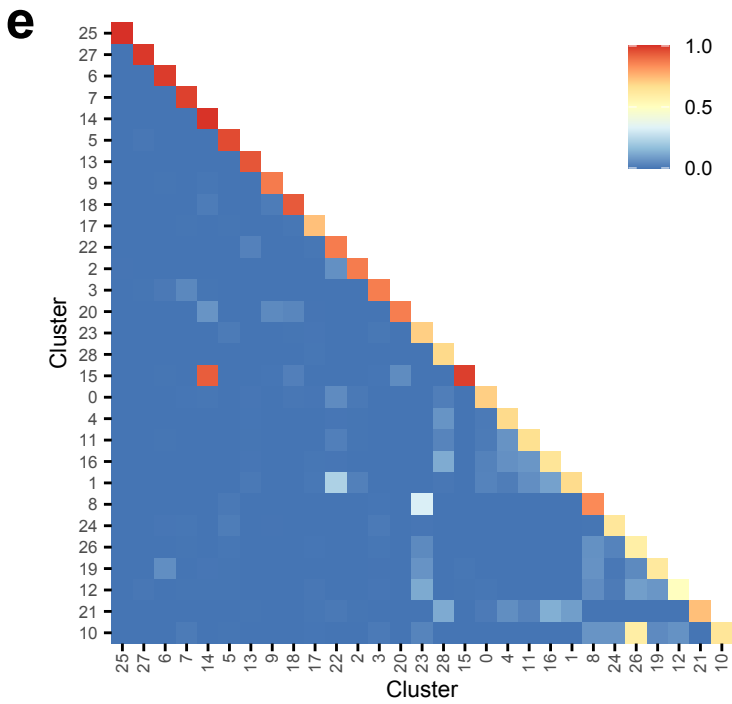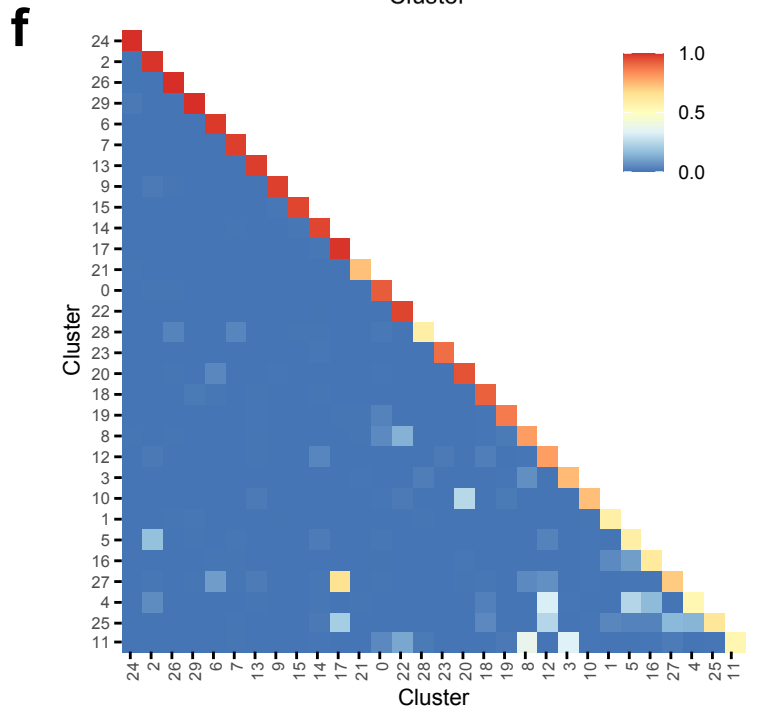

Supplement: 12859_2021_3957_MOESM4_ESM.pdf [file 12859_2021_3957_MOESM4_ESM.pdf]
